# Supplementary material for: An actin-related protein that is most highly expressed in Drosophila testes is critical for embryonic development
Source: eLife journal article supplement (doi:10.7554/elife.71279), 2021-07-19
Supplement: fig7-figsupp1-data2 [file elife-71279-fig7-figsupp1-data2-v1.pdf]

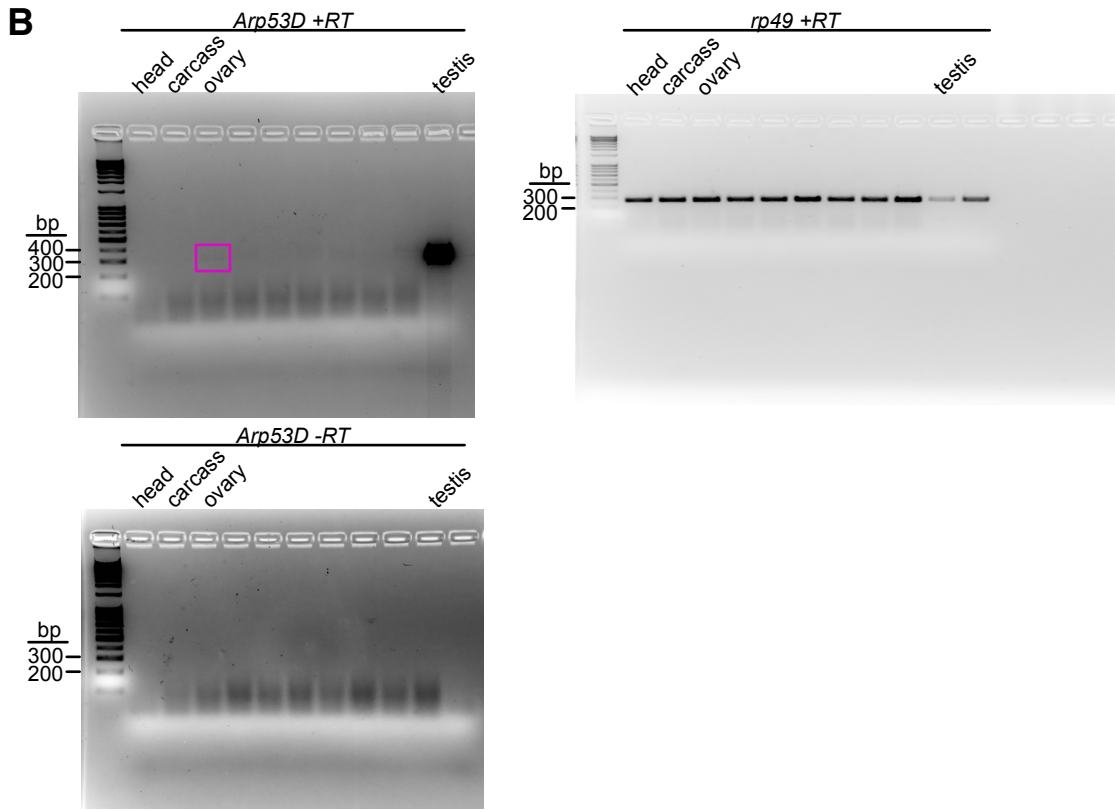

Figure 7-figure supplement 1-source data 2
