# Supplementary material for: An actin-related protein that is most highly expressed in Drosophila testes is critical for embryonic development
Source: eLife. 2021 Jul 20;10:e71279. doi: 10.7554/eLife.71279 (PMC8291977; doi:10.7554/eLife.71279)
Supplement: Supplementary file 1. — For each panel, it is shown how the chi-squared test was conducted and the percent genotypes are graphed per replicate. [file elife-71279-supp1.xlsx]

## Sheet: Fig 5B
WT females x WT male + KO male
	Observed				% genotypes per replicate
replicate	Het	WT	total progeny/vial		Het	WT
1	103	92	195		52.8205	47.1795
2	136	43	179		75.9777	24.0223
3	145	51	196		73.9796	26.0204
4	147	42	189		77.7778	22.2222
5	157	25	182		86.2637	13.7363
6	157	103	260		60.3846	39.6154
7	98	73	171		57.3099	42.6901
8	131	50	181		72.3757	27.6243
9	113	111	224		50.4464	49.5536
10	119	50	169		70.4142	29.5858
	Observed				Expected
	Het	WT	total		Het	WT
	1306	640	1946		973	973
	Chi-squared test
p-value:	1.68388e-51

## Sheet: Fig 8A
F Het x KO M									KO Female x Het male
Observed	female		male						Observed					Expected - calculate these as 50% of total progeny
replicate	KO	Het	KO	Het	sum/vial				replicate	KO	Het	total progeny/vial		replicate	KO	Het	total progeny/vial
1	55	56	65	67	243				1	9	17	26		1	13	13	26
2	52	82	60	66	260				2	6	25	31		2	15.5	15.5	31
3	42	48	39	38	167				3	7	23	30		3	15	15	30
4	49	85	68	76	278				4	8	21	29		4	14.5	14.5	29
5	67	66	58	67	258				5	5	18	23		5	11.5	11.5	23
									6	11	20	31		6	15.5	15.5	31
	observed:		expected: Fhet x koM						7	12	24	36		7	18	18	36
	KO	Het	KO	HET
	120	123	121.5	121.5
	112	148	130	130					Chi-squared test
	81	86	83.5	83.5					p-value:
	117	161	139	139					1.51325e-07
	125	133	129	129
	Chi-squared test				Expected:				% adult progeny:
	Ds+ HOM	Ds+ HET	total progeny/vial			Ds+ HOM	Ds+ HET			% hom	% het
	555	651	1206			603	603		1	34.6154	65.3846
									2	19.3548	80.6452
	p-value:	0.00570313							3	23.3333	76.6667
									4	27.5862	72.4138
	% adult progeny:								5	21.7391	78.2609
		% hom	% het						6	35.4839	64.5161
	1	49.3827	50.6173						7	33.3333	66.6667
	2	43.0769	56.9231
	3	48.503	51.497
	4	42.0863	57.9137
	5	48.4496	51.5504

## Sheet: Fig 8B
Het x Het
	OBSERVED					OBSERVED					OBSERVED
	female					male					female and male combined			% of population per vial
vial	ko	het	wt			ko	het	wt	sum/vial		ko	het	wt	ko	het	wt
1	27	64	30			31	56	23	231		58	120	53	25.1082	51.9481	22.9437
2	21	45	11			36	35	13	161		57	80	24	35.4037	49.6894	14.9068
3	10	48	19			13	38	20	148		23	86	39	15.5405	58.1081	26.3514
4	40	87	43			23	76	29	298		63	163	72	21.1409	54.698	24.1611
5	37	57	34			39	52	34	253		76	109	68	30.0395	43.083	26.8775
Summing across vials
	observed					expected
	ko	het	wt	total		ko	het	wt
all vials	277	558	256	1091		272.75	545.5	272.75
	Chi-squared test
p-value:	0.50125
